# Supplementary material for: Distribution and Numbers of Three Globally Threatened Waterbird Species Wintering in Morocco: The Common Pochard, Marbled Teal, and White-Headed Duck
Source: Hindawi journal article supplement (doi:10.1155/2021/8846203), 2021-01-21
Supplement: f1 [file 8846203.f1.pdf]

| Site name                         | Average number (long-term) | Average number (short-term) | Min  | Max   | Number of visits per site | 1st year of site's census | Last year of site's census | Occurrence | 1st occurrence of the species' in the site | Last occurrence of the species' in the site |
|-----------------------------------|----------------------------|-----------------------------|------|-------|---------------------------|---------------------------|----------------------------|------------|--------------------------------------------|---------------------------------------------|
|                                   | 11158                      | 7496                        | 1710 | 20458 |                           |                           |                            |            |                                            |                                             |
| Barrage Oued Rmel                 | 124                        | 124                         | 87   | 160   | 2                         | 2018                      | 2019                       | 2          | 2019                                       | 2019                                        |
| Merja Sidi Qacem                  | 0                          | 0                           | 4    | 4     | 17                        | 1984                      | 2019                       | 1          | 1996                                       | 1996                                        |
| Marais de l'wad Smir              | 42                         | 87                          | 6    | 391   | 36                        | 1983                      | 2019                       | 15         | 1983                                       | 2019                                        |
| Barrage de Smir                   | 346                        | 312                         | 6    | 1689  | 23                        | 1992                      | 2019                       | 20         | 1992                                       | 2019                                        |
| Daya Sghira                       | 10                         | 0                           | 7    | 70    | 8                         | 1984                      | 2016                       | 2          | 1997                                       | 1998                                        |
| Barrage Ibn Battota               | 21                         | 11                          | 4    | 94    | 8                         | 1990                      | 2019                       | 5          | 1990                                       | 2019                                        |
| Merja Hawwara                     | 0                          | 0                           | 4    | 4     | 21                        | 1990                      | 2019                       | 1          | 2003                                       | 2003                                        |
| Embouchure de l'wad Martil        | 2                          | 4                           | 26   | 26    | 16                        | 1991                      | 2019                       | 1          | 2015                                       | 2015                                        |
| Mlalah du Bas Tahaddart           | 21                         | 69                          | 4    | 480   | 24                        | 1992                      | 2019                       | 3          | 1999                                       | 2011                                        |
| Barrage du 09 avril 1947          | 2                          | 2                           | 6    | 6     | 3                         | 2016                      | 2019                       | 1          | 2016                                       | 2016                                        |
| Sadd Al Ajas                      | 59                         | 305                         | 3    | 305   | 19                        | 1985                      | 2019                       | 13         | 1988                                       | 2019                                        |
| Merja des Wlad Khallouf           | 16                         | 30                          | 2    | 240   | 32                        | 1983                      | 2019                       | 7          | 1986                                       | 2011                                        |
| Sadd An-Nakhla                    | 0                          |                             | 2    | 2     | 12                        | 1983                      | 2000                       | 1          | 1984                                       | 1984                                        |
| Embouchure de Wad Loukkos         | 0                          | 0                           | 4    | 4     | 33                        | 1984                      | 2019                       | 1          | 2018                                       | 2018                                        |
| Marais du bas Loukkos             | 54                         | 34                          | 1    | 410   | 36                        | 1984                      | 2019                       | 24         | 1985                                       | 2018                                        |
| Merja des Wlad Skher              | 103                        | 23                          | 2    | 650   | 28                        | 1989                      | 2019                       | 20         | 1989                                       | 2015                                        |
| Dayas Zarafa et Mhibess           | 1                          | 0                           | 1    | 5     | 7                         | 1990                      | 2019                       | 2          | 1990                                       | 1994                                        |
| Merja Bargha                      | 216                        | 89                          | 40   | 1590  | 28                        | 1988                      | 2019                       | 18         | 1990                                       | 2015                                        |
| Merja Al Halloufa                 | 134                        | 25                          | 2    | 680   | 31                        | 1986                      | 2019                       | 20         | 1986                                       | 2019                                        |
| Barrage Wad Al Makhazine          | 288                        | 317                         | 70   | 1101  | 9                         | 1991                      | 2019                       | 6          | 1993                                       | 2019                                        |
| Barrage de Wazzane                | 8                          |                             | 1    | 40    | 12                        | 1983                      | 1995                       | 9          | 1983                                       | 1993                                        |
| Merja Zerga                       | 109                        | 210                         | 2    | 1800  | 37                        | 1983                      | 2019                       | 12         | 1983                                       | 2014                                        |
| Merja Dawra-Ben Mansour           | 23                         | 17                          | 50   | 96    | 9                         | 1984                      | 2018                       | 3          | 1984                                       | 2010                                        |
| Barrage Sahla                     | 85                         | 85                          | 5    | 164   | 2                         | 2016                      | 2019                       | 2          | 2016                                       | 2019                                        |
| Barrage Al Wahda                  | 84                         | 84                          | 51   | 283   | 4                         | 2014                      | 2019                       | 2          | 2015                                       | 2019                                        |
| Merja Boukka                      | 2                          |                             | 2    | 11    | 7                         | 1987                      | 1995                       | 3          | 1987                                       | 1990                                        |
| Merja de l'wad Fouwarate          | 180                        | 413                         | 3    | 1000  | 21                        | 1990                      | 2019                       | 12         | 1998                                       | 2019                                        |
| Merja de Sidi Bou Ghaba           | 235                        | 514                         | 7    | 1200  | 34                        | 1983                      | 2019                       | 30         | 1984                                       | 2019                                        |
| Barrage Idriss Premier            | 84                         | 34                          | 8    | 570   | 27                        | 1983                      | 2019                       | 18         | 1984                                       | 2019                                        |
| Barrage Sidi Echahed              | 2                          | 2                           | 2    | 8     | 5                         | 2014                      | 2019                       | 2          | 2014                                       | 2019                                        |
| Plan d'eau de Dwiya               | 296                        |                             | 36   | 1368  | 15                        | 1983                      | 2008                       | 15         | 1983                                       | 2008                                        |
| Plan d'eau de l'wad Fès           | 23                         | 5                           | 10   | 104   | 5                         | 1990                      | 2019                       | 2          | 1990                                       | 2019                                        |
| Barrage d'Al Qansera              | 276                        | 0                           | 8    | 790   | 13                        | 1983                      | 2014                       | 11         | 1983                                       | 1999                                        |
| Barrage El Mehraz                 | 1                          | 1                           | 4    | 4     | 4                         | 2014                      | 2019                       | 1          | 2014                                       | 2014                                        |
| Dayet Ar-Roumi                    | 28                         | 9                           | 2    | 290   | 16                        | 1983                      | 2019                       | 9          | 1983                                       | 2011                                        |
| Sebkha Bou Areg                   | 49                         | 12                          | 4    | 406   | 30                        | 1983                      | 2019                       | 11         | 1989                                       | 2019                                        |
| Embouchure de l'wad Malwiya       | 48                         | 104                         | 2    | 224   | 32                        | 1983                      | 2019                       | 19         | 1983                                       | 2019                                        |
| Barrage Ben Abdelkrim Al Khattabi | 123                        | 0                           | 1    | 500   | 10                        | 1984                      | 2018                       | 5          | 1984                                       | 1995                                        |
| Barrage 'Arabat                   | 38                         | 38                          | 20   | 94    | 3                         | 2014                      | 2019                       | 2          | 2018                                       | 2019                                        |
| Sebkha Fida Ameziane              | 50                         |                             | 200  | 200   | 4                         | 1983                      | 1990                       | 1          | 1983                                       | 1983                                        |
| Barrage Mechra' Hommadi           | 61                         | 126                         | 10   | 290   | 15                        | 1983                      | 2019                       | 11         | 1983                                       | 2019                                        |
| Barrage Mohammed V                | 2331                       | 626                         | 4    | 15600 | 26                        | 1984                      | 2019                       | 21         | 1989                                       | 2019                                        |
| Barrage de 'Aïn Tijja             | 3                          |                             | 6    | 6     | 2                         | 1992                      | 1994                       | 1          | 1994                                       | 1994                                        |
| Barrage Asfalou                   | 300                        | 300                         | 300  | 300   | 1                         | 2019                      | 2019                       | 1          | 2019                                       | 2019                                        |
| Barrage Hassan II                 | 130                        | 186                         | 1    | 1100  | 10                        | 2007                      | 2019                       | 5          | 2009                                       | 2019                                        |
| Barrage de 'Aïn Bni Mathar        | 0                          | 0                           | 2    | 2     | 10                        | 1986                      | 2019                       | 1          | 2007                                       | 2007                                        |
| Barrage Petit Tizil               | 37                         | 52                          | 4    | 250   | 10                        | 2007                      | 2019                       | 3          | 2007                                       | 2013                                        |
| Barrage Kheng El Hda              | 60                         | 67                          | 24   | 200   | 12                        | 2007                      | 2019                       | 9          | 2007                                       | 2019                                        |
| Daya Oum Slimane                  | 2                          | 0                           | 15   | 15    | 8                         | 2007                      | 2019                       | 1          | 2009                                       | 2009                                        |
| Barrage Enjil                     | 108                        | 124                         | 9    | 690   | 12                        | 2007                      | 2019                       | 11         | 2007                                       | 2019                                        |
| Barrage Hamou Ourzag              | 10                         | 7                           | 4    | 47    | 11                        | 2007                      | 2019                       | 6          | 2007                                       | 2019                                        |
| Barrage Cherg Bouarfa             | 1                          | 2                           | 11   | 11    | 10                        | 2007                      | 2019                       | 1          | 2019                                       | 2019                                        |
| Daya Atchana                      | 6                          | 0                           | 35   | 35    | 6                         | 2007                      | 2019                       | 1          | 2009                                       | 2009                                        |
| Plan d'eau de Dar As-Salam        | 46                         |                             | 46   | 46    | 1                         | 1990                      | 1990                       | 1          | 1990                                       | 1990                                        |
| Bge Sidi Mohammed Ben Abdallah    | 49                         | 0                           | 40   | 600   | 13                        | 1983                      | 2014                       | 2          | 1994                                       | 2009                                        |
| Barrage Rwidate                   | 38                         | 0                           | 1    | 92    | 5                         | 1991                      | 2014                       | 4          | 1991                                       | 2009                                        |
| Réserve royale Aïn Sferjla        | 41                         | 2                           | 2    | 80    | 2                         | 2009                      | 2014                       | 2          | 2009                                       | 2014                                        |
| Domaine Royal la Gazelle          | 1                          | 0                           | 1    | 3     | 3                         | 1991                      | 2014                       | 2          | 1991                                       | 1995                                        |
| Marais de Wad Al Maleh            | 50                         | 7                           | 20   | 280   | 6                         | 2001                      | 2017                       | 2          | 2008                                       | 2011                                        |
| Barrage Hassar                    | 74                         | 74                          | 6    | 148   | 5                         | 2014                      | 2019                       | 4          | 2014                                       | 2017                                        |
| Barrage de l'wad Al Mellah        | 132                        | 1                           | 5    | 500   | 17                        | 1983                      | 2017                       | 13         | 1983                                       | 2014                                        |
| Daya d'Al Jadida                  | 6                          |                             | 4    | 21    | 6                         | 1986                      | 1994                       | 3          | 1987                                       | 1990                                        |
| Barrage Sidi Sa'id M'achou        | 1                          |                             | 3    | 3     | 4                         | 1983                      | 2009                       | 1          | 2009                                       | 2009                                        |
| Dayet Al Fahs                     | 78                         | 0                           | 3    | 700   | 27                        | 1985                      | 2018                       | 10         | 1985                                       | 2004                                        |
| Barrage Tamesna                   | 2                          | 2                           | 2    | 2     | 1                         | 2014                      | 2014                       | 1          | 2014                                       | 2014                                        |
| Barrage de Dawrate                | 53                         |                             | 12   | 200   | 4                         | 1983                      | 1991                       | 2          | 1984                                       | 1991                                        |
| Lagunes de Sidi Moussa-Walidia    | 163                        | 16                          | 5    | 2500  | 35                        | 1983                      | 2019                       | 23         | 1984                                       | 2018                                        |
| Dayet Taras El Ghoul              | 14                         | 0                           | 42   | 120   | 21                        | 1998                      | 2019                       | 4          | 1998                                       | 2004                                        |
| Daya Al Beyda                     | 23                         | 0                           | 38   | 360   | 17                        | 1998                      | 2019                       | 2          | 1998                                       | 1999                                        |
| Dayet Sbih                        | 2                          | 0                           | 5    | 25    | 19                        | 1999                      | 2019                       | 2          | 1999                                       | 2001                                        |
| Dayet Warar                       | 163                        |                             | 6    | 550   | 4                         | 2003                      | 2009                       | 3          | 2003                                       | 2009                                        |
| Barrage d'Imfout                  | 1                          |                             | 4    | 4     | 3                         | 1983                      | 1991                       | 1          | 1991                                       | 1991                                        |
| Barrage Ahmed El Hansali          | 6                          | 6                           | 12   | 12    | 2                         | 2018                      | 2019                       | 1          | 2018                                       | 2018                                        |

| Site name                       | Average number (long-term) | Average number (short-term) | Min | Max  | Number of visits per site | 1st year of site's census | Last year of site's census | Occurrence | 1st occurrence of the species' in the site | Last occurrence of the species' in the site |
|---------------------------------|----------------------------|-----------------------------|-----|------|---------------------------|---------------------------|----------------------------|------------|--------------------------------------------|---------------------------------------------|
| Barrage Al Massira              | 1246                       | 256                         | 4   | 7038 | 29                        | 1984                      | 2018                       | 20         | 1988                                       | 2018                                        |
| Plan d'eau de Safi              | 2                          | 0                           | 2   | 38   | 28                        | 1984                      | 2019                       | 6          | 1984                                       | 2010                                        |
| Sebkha Zima                     | 4                          | 0                           | 10  | 74   | 35                        | 1983                      | 2019                       | 3          | 1985                                       | 1996                                        |
| Barrage Timin'Outine            | 20                         | 20                          | 20  | 20   | 1                         | 2019                      | 2019                       | 1          | 2019                                       | 2019                                        |
| Barrage Moulay Youssef          | 38                         | 94                          | 10  | 114  | 7                         | 1983                      | 2019                       | 4          | 1991                                       | 2019                                        |
| Bassins de Marrakech            | 7                          |                             | 4   | 15   | 6                         | 1983                      | 1993                       | 4          | 1983                                       | 1987                                        |
| Côte et Archipel d'Essawira     | 2                          | 0                           | 26  | 26   | 17                        | 1995                      | 2017                       | 1          | 1995                                       | 1995                                        |
| Barrage Lalla Takerkoust        | 34                         |                             | 1   | 300  | 11                        | 1983                      | 1999                       | 7          | 1984                                       | 1994                                        |
| Davet 'Awa                      | 88                         | 122                         | 1   | 1030 | 30                        | 1983                      | 2019                       | 22         | 1983                                       | 2014                                        |
| Plan d'eau de Sidi Mimoun       | 1                          | 3                           | 2   | 4    | 10                        | 1986                      | 2019                       | 4          | 1986                                       | 2019                                        |
| Aguelmam Afourgagh              | 4                          | 18                          | 1   | 23   | 17                        | 1983                      | 2019                       | 6          | 1985                                       | 2019                                        |
| Plan d'eau de Mou'Ali           | 1                          |                             | 2   | 2    | 3                         | 1987                      | 1995                       | 1          | 1987                                       | 1987                                        |
| Davet Hachlaf                   | 44                         | 45                          | 4   | 163  | 9                         | 1997                      | 2019                       | 6          | 2008                                       | 2018                                        |
| Davet Ifrah                     | 187                        | 180                         | 2   | 860  | 31                        | 1983                      | 2019                       | 27         | 1983                                       | 2019                                        |
| Plan d'eau de Zerrouqa          | 34                         | 15                          | 1   | 230  | 26                        | 1984                      | 2019                       | 13         | 1987                                       | 2019                                        |
| Plans d'eau d'Amghass           | 1                          |                             | 4   | 4    | 7                         | 1988                      | 2000                       | 1          | 1995                                       | 1995                                        |
| Aguelmam Afennourir             | 471                        | 468                         | 20  | 2600 | 27                        | 1983                      | 2019                       | 25         | 1983                                       | 2019                                        |
| Aguelmams NT'idwit-Agourar      | 10                         | 10                          | 10  | 10   | 1                         | 2014                      | 2014                       | 1          | 2014                                       | 2014                                        |
| Aguelmam NT'ifounassine         | 60                         | 227                         | 10  | 652  | 22                        | 1987                      | 2018                       | 9          | 1994                                       | 2014                                        |
| Aguelmam Wiwane                 | 6                          | 19                          | 4   | 74   | 23                        | 1983                      | 2019                       | 5          | 2001                                       | 2019                                        |
| Aguelmams Sidi Ali-Ta'nzoult    | 152                        | 172                         | 1   | 1700 | 30                        | 1983                      | 2019                       | 21         | 1983                                       | 2019                                        |
| Aguelmam Azegza                 | 3                          | 0                           | 5   | 16   | 21                        | 1983                      | 2019                       | 7          | 1983                                       | 2001                                        |
| Aguelmam Abekhane               | 352                        | 296                         | 34  | 855  | 19                        | 1983                      | 2019                       | 19         | 1983                                       | 2019                                        |
| Lac d'Isly                      | 12                         | 0                           | 18  | 33   | 6                         | 1983                      | 2019                       | 3          | 1983                                       | 1991                                        |
| Lac de Tislite                  | 33                         | 6                           | 2   | 142  | 6                         | 1983                      | 2019                       | 7          | 1983                                       | 2019                                        |
| Barrage Bin Al Widane           | 133                        | 8                           | 11  | 471  | 11                        | 1984                      | 2019                       | 8          | 1984                                       | 2018                                        |
| Barrage Hassan Ad-Dakhil        | 210                        | 850                         | 14  | 1700 | 9                         | 1983                      | 2014                       | 3          | 1991                                       | 2010                                        |
| Barrage Rkiza                   | 19                         | 19                          | 19  | 19   | 1                         | 2019                      | 2019                       | 1          | 2019                                       | 2019                                        |
| Daya Benneima                   | 15                         | 15                          | 10  | 29   | 4                         | 2016                      | 2019                       | 3          | 2016                                       | 2018                                        |
| Barrage Zelmou                  | 39                         | 38                          | 2   | 159  | 11                        | 2007                      | 2019                       | 10         | 2007                                       | 2019                                        |
| Daya Tamezguidat (Merzouga)     | 12                         | 26                          | 26  | 48   | 6                         | 1986                      | 2019                       | 2          | 1994                                       | 2019                                        |
| Barrage Al Mansour Ad-Dahbi     | 8                          | 5                           | 2   | 63   | 28                        | 1983                      | 2018                       | 12         | 1984                                       | 2015                                        |
| Barrage Taghdout                | 11                         | 0                           | 6   | 100  | 11                        | 1984                      | 2015                       | 3          | 1984                                       | 1993                                        |
| Embouchure de l'wad Souss       | 1                          | 0                           | 26  | 26   | 36                        | 1983                      | 2019                       | 1          | 1986                                       | 1986                                        |
| Embouchure de l'wad Massa       | 646                        | 23                          | 2   | 3330 | 37                        | 1983                      | 2019                       | 29         | 1983                                       | 2017                                        |
| Barrage Youssef Ben Tachafine   | 42                         |                             | 2   | 191  | 11                        | 1984                      | 2002                       | 7          | 1988                                       | 1996                                        |
| Embouchure de l'wad Assaka      | 20                         | 1                           | 3   | 200  | 11                        | 1993                      | 2018                       | 3          | 1994                                       | 2017                                        |
| Plage Ras Takoumba-Bou Issafène | 0                          | 0                           | 3   | 3    | 11                        | 1997                      | 2019                       | 1          | 1997                                       | 1997                                        |
| Embouchure de Wad Bou Issafine  | 0                          | 1                           | 4   | 4    | 14                        | 1993                      | 2018                       | 1          | 2018                                       | 2018                                        |
| Embouchure de l'wad Chbeyka     | 0                          | 0                           | 1   | 1    | 34                        | 1984                      | 2019                       | 1          | 1997                                       | 1997                                        |
| Embouchure de l'wad Al Wa'er    | 4                          | 0                           | 14  | 52   | 32                        | 1984                      | 2018                       | 4          | 1985                                       | 1992                                        |
| Embouchure de l'wad Oumma Fatma | 1                          | 0                           | 1   | 19   | 33                        | 1984                      | 2019                       | 2          | 1996                                       | 2002                                        |
| Daya La'wina (Khnifiss)         | 10                         | 0                           | 26  | 68   | 9                         | 1986                      | 2018                       | 2          | 1986                                       | 1994                                        |
| Wad As-Saqja Al Hamra à La'youn | 2                          | 5                           | 2   | 46   | 30                        | 1983                      | 2019                       | 3          | 2001                                       | 2018                                        |
| Baie d'Ad-Dakhla                | 0                          | 0                           | 1   | 1    | 26                        | 1989                      | 2019                       | 1          | 1995                                       | 1995                                        |



| Site name                       | Average number (long-term) | Average number (short-term) | Min | Max  | Number of visits per site | 1st year of site's census | Last year of site's census | Occurrence | 1st occurrence of the species' in the site | Last occurrence of the species' in the site |
|---------------------------------|----------------------------|-----------------------------|-----|------|---------------------------|---------------------------|----------------------------|------------|--------------------------------------------|---------------------------------------------|
|                                 | 3071                       | 3070                        |     |      |                           |                           |                            |            |                                            |                                             |
| Marais de Wad Smir              | 0                          | 1                           | 4   | 8    | 36                        | 1983                      | 2019                       | 2          | 1987                                       | 2011                                        |
| Embouchure de Wad Loukkos       | 1                          | 0                           | 1   | 10   | 33                        | 1984                      | 2019                       | 3          | 1994                                       | 2006                                        |
| Marais du bas Loukkos           | 8                          | 11                          | 2   | 82   | 36                        | 1984                      | 2019                       | 10         | 1985                                       | 2018                                        |
| Merja des Wlad Skher            | 1                          | 0                           | 2   | 14   | 28                        | 1989                      | 2019                       | 2          | 1992                                       | 1998                                        |
| Merja Bargha                    | 1                          | 2                           | 6   | 12   | 28                        | 1988                      | 2019                       | 2          | 2011                                       | 2015                                        |
| Merja Zerga                     | 36                         | 83                          | 4   | 200  | 37                        | 1983                      | 2019                       | 19         | 1983                                       | 2019                                        |
| Merja de Fouwarate              | 51                         | 119                         | 12  | 400  | 21                        | 1990                      | 2019                       | 8          | 2011                                       | 2019                                        |
| Merja de Sidi Bou Ghaba         | 211                        | 74                          | 4   | 1400 | 34                        | 1983                      | 2019                       | 33         | 1983                                       | 2019                                        |
| Barrage Idriss Premier          | 0                          | 2                           | 10  | 10   | 27                        | 1983                      | 2019                       | 1          | 2016                                       | 2016                                        |
| Plan d'eau de Dwiyaate          | 14                         |                             | 1   | 120  | 15                        | 1983                      | 2008                       | 8          | 1983                                       | 2005                                        |
| Sebkha Bou Areg                 | 0                          | 0                           | 1   | 4    | 30                        | 1983                      | 2019                       | 2          | 1990                                       | 1992                                        |
| Embouchure de Wad Malwiya       | 12                         | 15                          | 2   | 142  | 32                        | 1983                      | 2019                       | 16         | 1994                                       | 2019                                        |
| Barrage Mohammed V              | 15                         | 50                          | 3   | 230  | 26                        | 1984                      | 2019                       | 5          | 2006                                       | 2019                                        |
| Daya Atchana                    | 2                          | 3                           | 12  | 12   | 6                         | 2007                      | 2019                       | 1          | 2017                                       | 2017                                        |
| Barrage Rwidate                 | 3                          | 0                           | 14  | 14   | 5                         | 1991                      | 2014                       | 1          | 1991                                       | 1991                                        |
| Marais de Wad Al Maleh          | 63                         | 22                          | 2   | 248  | 6                         | 2001                      | 2017                       | 6          | 2001                                       | 2017                                        |
| Zones humides de Dar Bouaaza    | 1                          | 1                           | 2   | 2    | 2                         | 2017                      | 2019                       | 1          | 2019                                       | 2019                                        |
| Barrage Hassar                  | 36                         | 36                          | 18  | 128  | 5                         | 2014                      | 2019                       | 3          | 2014                                       | 2017                                        |
| Daya d'Al Jadida                | 1                          |                             | 8   | 8    | 6                         | 1986                      | 1994                       | 1          | 1993                                       | 1993                                        |
| Dayet Al Fahs                   | 47                         | 44                          | 7   | 636  | 27                        | 1985                      | 2018                       | 9          | 1992                                       | 2017                                        |
| Barrage Tamesna                 | 3                          | 3                           | 5   | 5    | 2                         | 2014                      | 2019                       | 1          | 2014                                       | 2014                                        |
| Lagunes de Sidi Moussa-Walidia  | 342                        | 157                         | 1   | 1800 | 35                        | 1983                      | 2019                       | 29         | 1984                                       | 2019                                        |
| Dayet Taras El Ghoul            | 28                         | 8                           | 3   | 350  | 21                        | 1998                      | 2019                       | 7          | 1998                                       | 2012                                        |
| Daya Al Beyda                   | 4                          | 6                           | 3   | 37   | 17                        | 1998                      | 2019                       | 5          | 1998                                       | 2011                                        |
| Dayet Warar                     | 31                         |                             | 35  | 90   | 4                         | 2003                      | 2009                       | 2          | 2003                                       | 2004                                        |
| Barrage Al Massira              | 96                         | 36                          | 35  | 1973 | 30                        | 1984                      | 2019                       | 8          | 1993                                       | 2018                                        |
| Sehb El Mejnoun                 | 3                          |                             | 15  | 15   | 6                         | 1984                      | 1997                       | 1          | 1988                                       | 1988                                        |
| Sebkha Zima                     | 81                         | 148                         | 3   | 950  | 35                        | 1983                      | 2019                       | 14         | 1985                                       | 2017                                        |
| Côte et Archipel d'Essawira     | 0                          | 1                           | 2   | 4    | 17                        | 1995                      | 2017                       | 2          | 2016                                       | 2017                                        |
| Dayet 'Awa                      | 1                          | 0                           | 28  | 28   | 30                        | 1983                      | 2018                       | 1          | 2000                                       | 2000                                        |
| Aguelmam Afennourir             | 0                          | 0                           | 5   | 5    | 27                        | 1983                      | 2019                       | 1          | 1998                                       | 1998                                        |
| Barrage Hassan Ad-Dakhil        | 42                         | 188                         | 36  | 339  | 9                         | 1983                      | 2014                       | 2          | 2010                                       | 2014                                        |
| Barrage Zelmou                  | 5                          | 5                           | 1   | 37   | 11                        | 2007                      | 2019                       | 6          | 2007                                       | 2012                                        |
| Daya Tamezguidat (Merzouga)     | 2                          | 0                           | 11  | 11   | 6                         | 1986                      | 2019                       | 1          | 2004                                       | 2004                                        |
| Barrage Al Mansour Ad-Dahbi     | 10                         | 6                           | 9   | 170  | 28                        | 1983                      | 2018                       | 8          | 1998                                       | 2014                                        |
| Barrage Moulay Abdellah         | 499                        | 499                         | 997 | 997  | 2                         | 2017                      | 2018                       | 1          | 2017                                       | 2017                                        |
| Barrage Taghdout                | 1                          | 1                           | 3   | 4    | 11                        | 1984                      | 2015                       | 2          | 1991                                       | 2011                                        |
| Embouchure de Wad Massa         | 69                         | 20                          | 1   | 397  | 37                        | 1983                      | 2019                       | 30         | 1983                                       | 2017                                        |
| Embouchure de Wad Assaka        | 6                          | 13                          | 1   | 52   | 11                        | 1993                      | 2018                       | 3          | 2011                                       | 2018                                        |
| Plage Ras Takoumba-Bou Issafine | 75                         | 31                          | 20  | 550  | 11                        | 1997                      | 2019                       | 4          | 1997                                       | 2019                                        |
| Embouchure de Wad Bou Issafine  | 5                          | 13                          | 7   | 60   | 13                        | 1993                      | 2018                       | 2          | 2017                                       | 2018                                        |
| Plage Blanche                   | 9                          | 17                          | 21  | 136  | 17                        | 1993                      | 2019                       | 2          | 2014                                       | 2019                                        |
| Radier de l'Oued Assaka         | 43                         | 43                          | 54  | 75   | 3                         | 2016                      | 2018                       | 2          | 2017                                       | 2018                                        |
| STEU Guelmim                    | 919                        | 919                         | 89  | 1748 | 2                         | 2016                      | 2018                       | 2          | 2016                                       | 2018                                        |
| Embouchure de Wad Dr'a          | 4                          | 0                           | 66  | 66   | 17                        | 1987                      | 2019                       | 1          | 2003                                       | 2003                                        |
| Embouchure de Wad Chbeyka       | 1                          | 1                           | 11  | 15   | 34                        | 1984                      | 2019                       | 2          | 2005                                       | 2014                                        |
| Daya La'wina (Khnifiss)         | 2                          |                             | 4   | 10   | 8                         | 1986                      | 2005                       | 2          | 1986                                       | 1990                                        |
| Lagune de Khnifiss              | 1                          | 2                           | 8   | 16   | 33                        | 1985                      | 2019                       | 2          | 2012                                       | 2015                                        |
| STEP Tarfaya                    | 44                         | 44                          | 44  | 44   | 1                         | 2018                      | 2018                       | 1          | 2018                                       | 2018                                        |
| Wad As-Saqia Al Hamra à La'youn | 246                        | 448                         | 10  | 3557 | 30                        | 1983                      | 2019                       | 18         | 1999                                       | 2019                                        |



**Table S4:**

List of the observers who contributed to the IWC program in Morocco between 1983 and 2019  
(in alphabetical order).



|                   |                 |                  |                          |                      |                   |                   |
|-------------------|-----------------|------------------|--------------------------|----------------------|-------------------|-------------------|
| <b>A</b>          | Bazairi H.      | Chahlaoui A.     | El Hamzaoui M.           | Gambarotta C.        | Ibn Tattou M.     | Laidi K.          |
| Abad D.J.         | Beaubrun P.C.   | Chakri S.        | El Haoua M.K.            | Garcia R.            | Issaouballah A.   | Larbi Jebari M.   |
| A. Chendoud       | Belghyti D.     | Charaf M.A.      | El Hassani A.            | Gargallo G.          | <b>J</b>          | Lasfar S.         |
| Abi K.            | Bendikia H.     | Charco J.        | El Idrissi Essougrati A. | Garza-hernandez J.A. | Jacob H.          | Ledant J.P.H.     |
| Achibane H.       | Bendraou H.     | Chavanon G.      | El Khamlichi R.          | Graf O.              | Jacob J.          | Lemrabett E.      |
| Aebischer A.      | Benhamza A.     | Chekrouni N.     | El Kharrim K.            | Grangier F.          | Jadid A.          | Lemssiah J.       |
| Aghnaj A.         | Benhoumman B.   | Cherkaoui I.     | El Khattabi A.           | Gretton A.           | Jai Fayez A.      | Lieron V.         |
| Aissami L.        | Benhoussa A.    | Chichi A.        | El Malki S.              | Guerinech A.         | Jansen J.         | <b>M</b>          |
| Aït Ben Addi      | Benlahcen M.    | Chikri K.        | El Mansouri I.           | Guillem R.           | Jaoudi F.         | Maamri A.         |
| Ait Salah A.      | Bennouna M.     | Chillasse L.     | El Mghari A.             | Gullick T.           | Jaziri H.         | Maghnoouj M.      |
| Ait Salem A.      | Bensusan K.     | Cole J.          | El Mouden E.H.           | <b>H</b>             | Jenifer J.        | Magin C.          |
| Ajeddou M.        | Beudels M.O.    | Cortes J.        | El Mounssi A.            | Haâbi L.             | Jensen R.         | Mahassini A.      |
| Alami Mhamdi M.   | Borderelle M.C. | Cuzin F.         | El Oualidi J.            | Haddou Z.            | Jerez Abbad D.    | Mahé E.           |
| Alaoui B.         | Bouaissi M.     | <b>D</b>         | Errati A.                | Hajib S.             | Johnson A.        | Marraha M.        |
| Alaoui M.Y.       | Bouajaja A.     | Dajjari H.       | Espinar R.R.             | Hajibi M.            | Jouda I.          | Mars N.           |
| Alaoui Mdaghri M. | Bouariche B.    | Dakki M.         | Essabbani A.             | Hamidi S.            | Joulami L.        | Martin B.         |
| Alazoua Z.        | Bouchefra A.    | Dalai M.         | Essalai K.               | Hammouradia H.       | Jubete F.         | Mdarhri Alaoui E. |
| Alouache E.       | Bouhdadi L.     | De Bellefroid F. | Ettalibi A..             | Hamza L.             | <b>K</b>          | Melhaoui M.       |
| Amezian M.        | Bouhdadi M.L.   | De La Cruz A.    | Exo K.M.                 | Hamza O.             | Kacemi M.         | Mesleard F.       |
| Amhend M.         | Boumaaza M.     | De La Perche N.  | <b>F</b>                 | Hamzaoui A.          | Kachiche H.       | Messaoudi N.      |
| Aourir M.         | Boumejou L.     | De Lope M. J.    | Fahd S.                  | Hanane S.            | Kamps M.          | Meziane           |
| Arahou M.         | Bourass K.      | Douini I.        | Fahmi A.                 | Hannane N.           | Kasbaji H.        | Mirari S.         |
| Arhzaf Z.L.       | Bourouah B.     | <b>E</b>         | Faqyhi Y.                | Harmas A.            | Kiiss M.          | Mokalik M.        |
| Asdad M.          | Boussadik H.    | El Agbani M.A.   | Fekhaoui M.              | Hassani H.           | Knauss P.         | Mokhlis M.        |
| Azaouaghe S.      | Bouzidi         | El Agy           | Fernandez J.             | Heridia R.           | Ksassoua K.       | Monchatre T.      |
| Azizi D.          | Bowden C.       | El Aouki A.      | Fettah M.                | Hilmi M.             | <b>L</b>          | Monier B.         |
| <b>B</b>          | <b>C</b>        | El Bakkali M.    | Fozzi A.                 | Himmi O.             | Laaouichi S..     | Mounir M.         |
| Baha M.           | Cabo J.         | El Banak A.      | Franchimont J.           | Hlal M.              | Labidi D.         | <b>N</b>          |
| Banan H.          | Carp E.         | El Bekkay M.     | Fraval C.                | Houilat N.           | Lafontaine D.A.J. | Naciri M.         |
| Baouab R.E.       | Cerezo P.       | El Brini H.      | Fraval E.                | Houilat R.           | Lafontaine R.M.J. | Nahhi H.          |
| Bayed A.          | Chafi H.        | El Ghazi A.      | Fuzzi A.                 | <b>I</b>             | Lahrouz S.        | Naya A.           |
| Baytar H.         | Chafik M.       | El Hamoumi R.    | <b>G</b>                 | Ibariouen M.         | Lahyane H.        | Neves R.          |

|              |                   |              |
|--------------|-------------------|--------------|
| Nicolle S.   | Rguibi Idrissi H. | <b>W</b>     |
| Noaman M.    | Rhemali A.        | Wahnon M.    |
| Notario J.   | Rhonam A.         | Warham P.    |
| Nouiri H.    | Ribi M.           | Warr S.      |
| <b>O</b>     | Rihane A.         | Werner S.    |
| Ochfy A.     | Romanski T.       | Willefert S. |
| Onrubia A.   | Rougui A.         | <b>Y</b>     |
| Orueta J.F.  | Rousselon P.L.    | Yahyaoui A.  |
| Ouahid H.    | Rufino R.         | Yome A.      |
| Ouassou A.   | Ruth G.           | <b>Z</b>     |
| Oubrou W.    | <b>S</b>          | Zadan Y.     |
| Oukanou L.   | Sahri N.          | Zaïr I.      |
| Ousaaid      | Salathe T.        | Zaouia Y.    |
| <b>P</b>     | Sara S.           | Zejjari M.   |
| Pariselle A. | Sayad A.          | Zekhnini O.  |
| Pascon J.    | Sehhar E.         | Zerdeb A.    |
| Perennou C.  | Slimani T.        | Znari M.     |
| Perez C.     | Smit C.J.         | Zwarts L.    |
| Perthuis A.  | Perthuis A.       |              |
| Petit Y.     | <b>T</b>          |              |
| Pilot M.     | Taib N.           |              |
| Pina P.      | Tamraoui Y.       |              |
| Pineau O.    | Tejjeni Y.        |              |
| Pisu D.      | Terrouzi E.       |              |
| Pouteau C.   | Thompson I.       |              |
| <b>Q</b>     | Tilly B.          |              |
| Qninba A.    | Torralvo C.       |              |
| <b>R</b>     | Touati Malih F.   |              |
| Radi M.      | Touzri M.         |              |
| Rahhali I.E. | <b>V</b>          |              |
| Ramdani M.   | Vangeluwe D.P.H.  |              |
| Ramirez R.   | Vollum A.         |              |
